# Supplementary material
Source: PubMed Central journal article supplement (PMC6684036)

# Figure S1

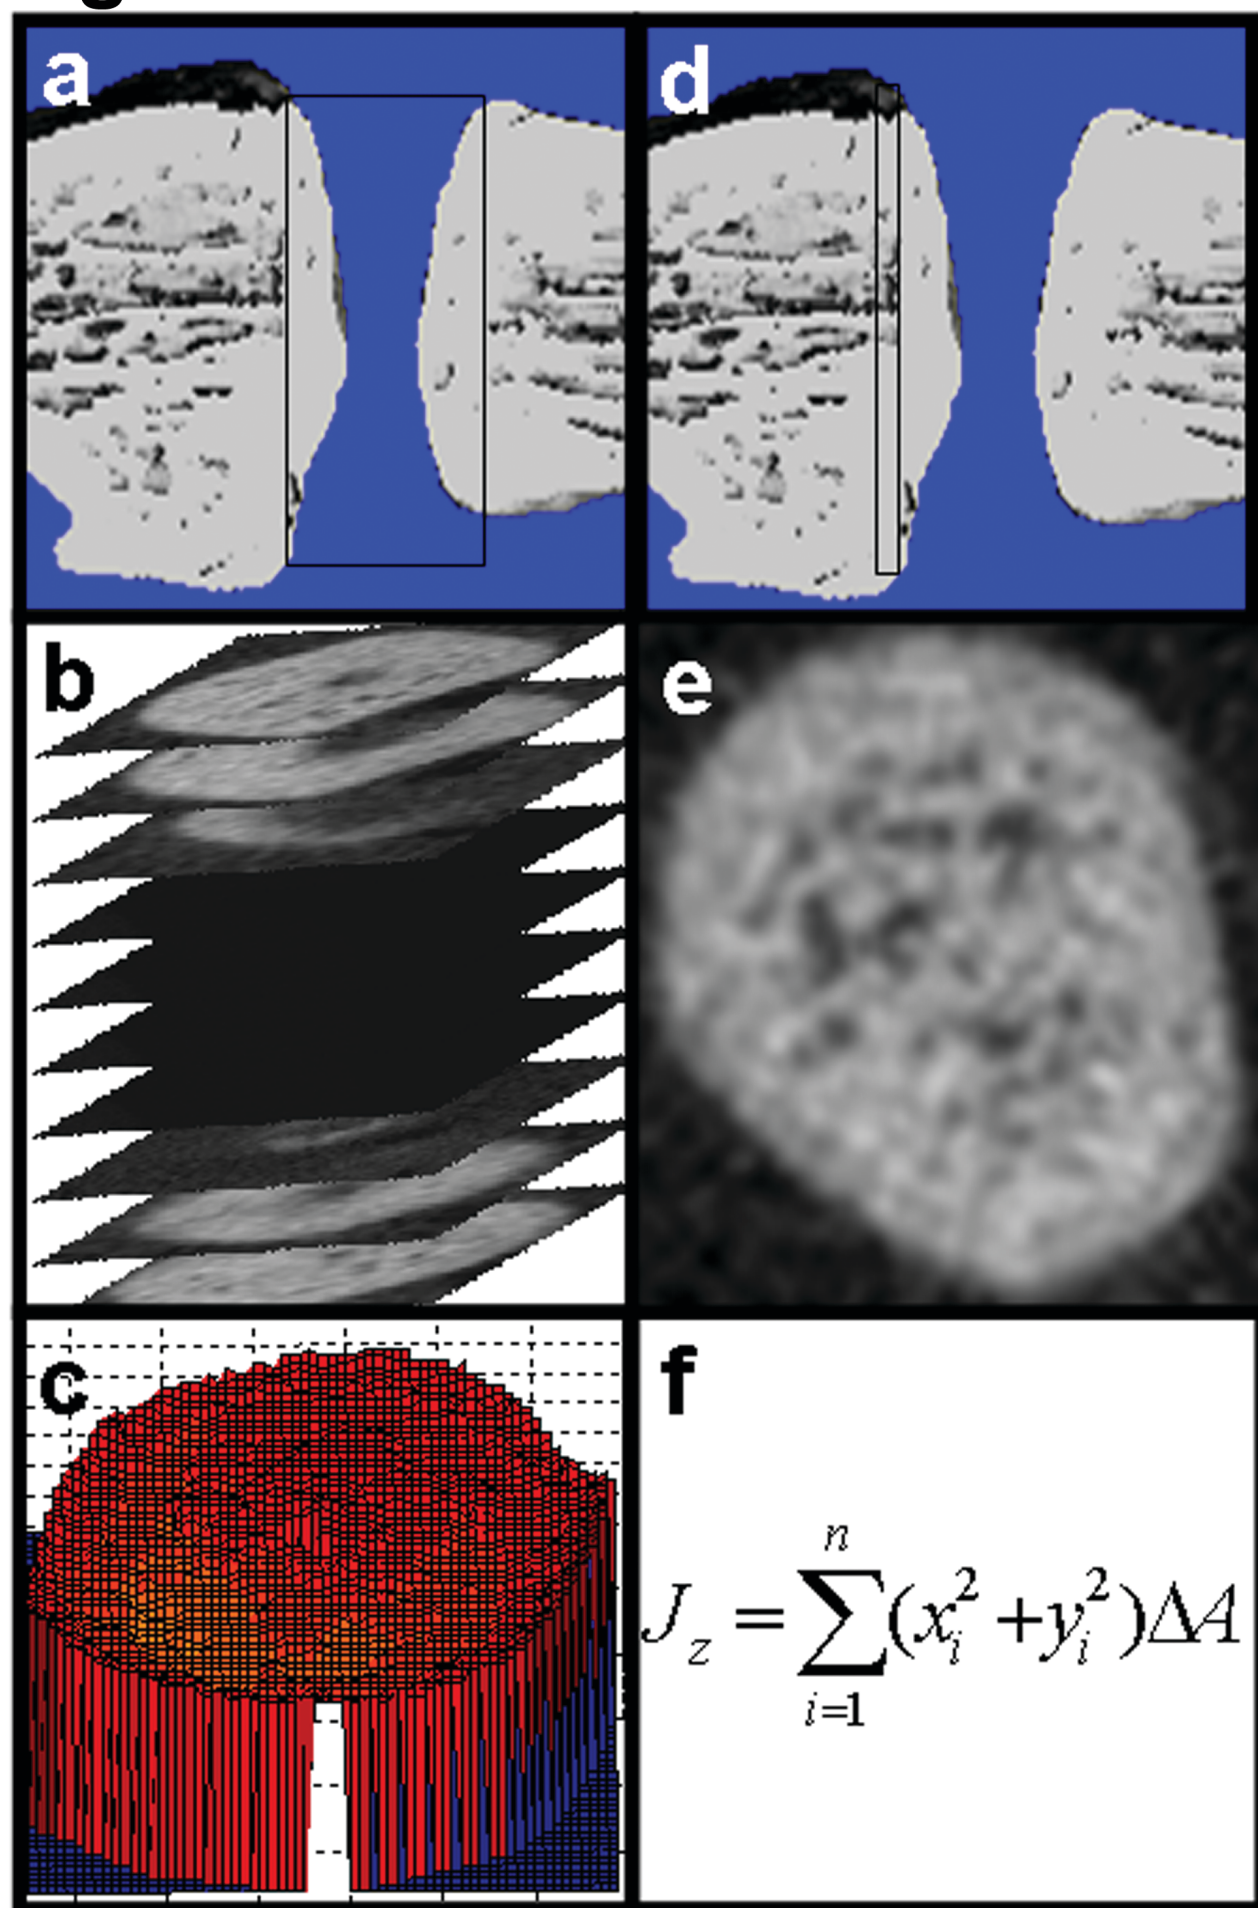

Supplement: NIHMS1043794-supplement-suplement.pdf [file NIHMS1043794-supplement-suplement.pdf]
